# Supplementary material for: Unravelling cytosolic delivery of cell penetrating peptides with a quantitative endosomal escape assay
Source: PubMed Central journal article supplement (PMC8211857; doi:10.1038/s41467-021-23997-x), 2021-06-17
Supplement: 41467_2021_23997_MOESM1_ESM.pdf [file 41467_2021_23997_MOESM1_ESM.pdf]

# Supplementary Information

## Unravelling cytosolic delivery of cell penetrating peptides with a quantitative endosomal escape assay

Serena L.Y. Teo<sup>1,2†</sup>, Joshua J. Rennick<sup>1,2†</sup>, Daniel Yuen<sup>1,2</sup>, Hareth Al-Wassiti<sup>1</sup>, Angus P.R. Johnston<sup>1,2\*</sup>, Colin W. Pouton<sup>1\*</sup>

<sup>1</sup>Monash Institute of Pharmaceutical Sciences, Monash University, Parkville, Victoria, Australia.

<sup>2</sup>ARC Centre of Excellence in Convergent Bio-Nano Science and Technology, Monash University, Parkville, Australia.

† These authors contributed equally to the work

\* Correspondence

Email: [angus.johnston@monash.edu](mailto:angus.johnston@monash.edu), [colin.pouton@monash.edu](mailto:colin.pouton@monash.edu)

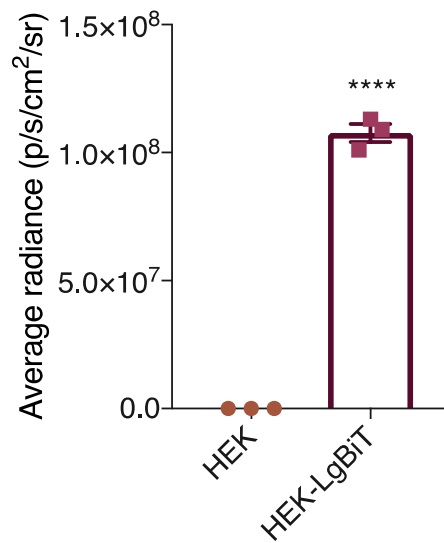

**Supplementary Fig. 1: Successful expression of LgBiT protein in HEK293 cells.** Non-transduced HEK293 cells and HEK293-LgBiT cells were seeded at 10,000 cells/well in black 96-well clear bottom plates. After overnight incubation, cells were treated with 1 nM HiBiT peptide and 0.01% w/v digitonin for 1 hour at 37°C to completely permeabilise the cells. NanoGlo Live Cell substrate was added to cells and luminescence was measured on IVIS Lumina II. Data represents mean  $\pm$  SEM, n=3 independent experiments. \*\*\*\* denotes  $p \leq 0.0001$

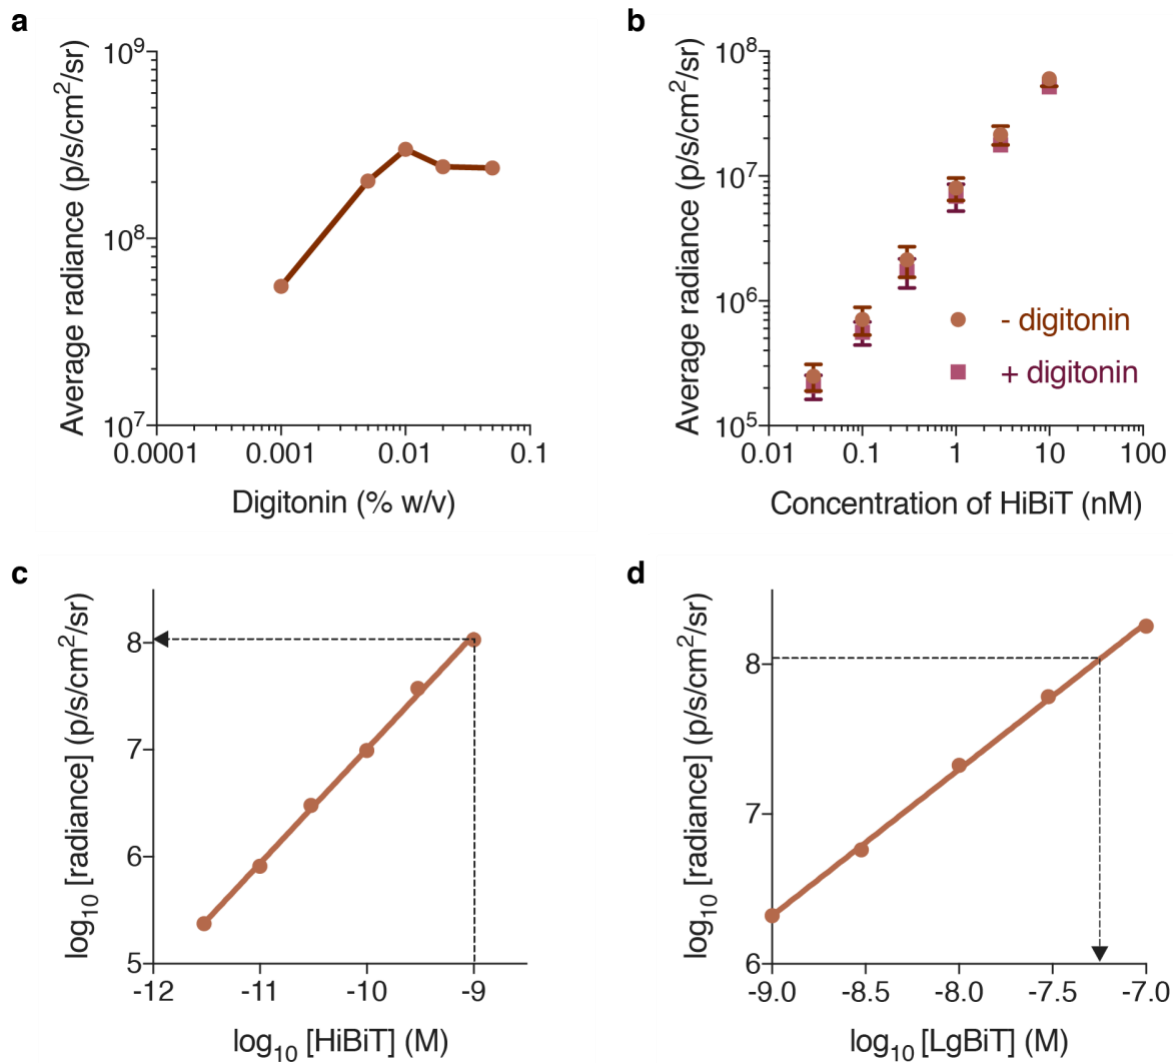

**Supplementary Fig. 2: Concentration of LSA expressed in HEK293-LSA cells.** a) 0.01% wt/v digitonin is sufficient to achieve total cell permeabilization. HEK293-LSA cells were seeded at 10,000 cells/well in black 96-well plates. After overnight incubation, cells were incubated with 1  $\mu$ M HiBiT peptide for 2 hours. Cells were washed and treated with various concentrations of digitonin (0.001, 0.005, 0.01, 0.02 and 0.05% w/v) for 30 minutes. NanoGlo Live Cell substrate was added and luminescence was measured on PerkinElmer In Vivo Imaging System Lumina II (IVIS) 30 minutes after substrate addition. Data represents mean, n =2 independent experiments. b) Digitonin does not affect luciferase activity. Purified LgBiT (50 nM) was combined with various concentrations of HiBiT peptide (0.03, 0.1, 0.3, 1, 3, 10 nM) with or without the presence of 0.01% wt/v digitonin. No difference in emitted radiance was observed with or without digitonin. Data represents mean  $\pm$  SD, n=3 independent experiments. c) Linear luminescence in permeabilised HEK293-LSA cells was obtained over concentration range of 3 pM to 1 nM HiBiT. HEK293-LSA cells seeded in black 96-well clear bottom microplates at 10,000 cells/well were permeabilised with digitonin (0.01% wt/v) and treated with various concentrations of HiBiT peptide. Linear regression analysis was used to determine the line of best fit. Data represents mean  $\pm$  SD, n=3. d) Total concentration of LSA expressed in HEK293 cells is determined to be 55.8 nM. Fixed 1 nM HiBiT peptide was titrated with various concentrations of purified LgBiT protein to construct a calibration curve. Data represents mean  $\pm$  SD, n=2. The y-value at 1 nM HiBiT peptide in Fig. S2c (see arrow in Fig. S2c, y = 8.03) was interpolated to obtain the log<sub>10</sub>

[LgBiT] value in the curve obtained (see arrow in Fig. S2d,  $x = -7.25$ ). The estimated concentration of LSA expressed in cells is therefore  $10^{-7.253} = 55.8$  nM.

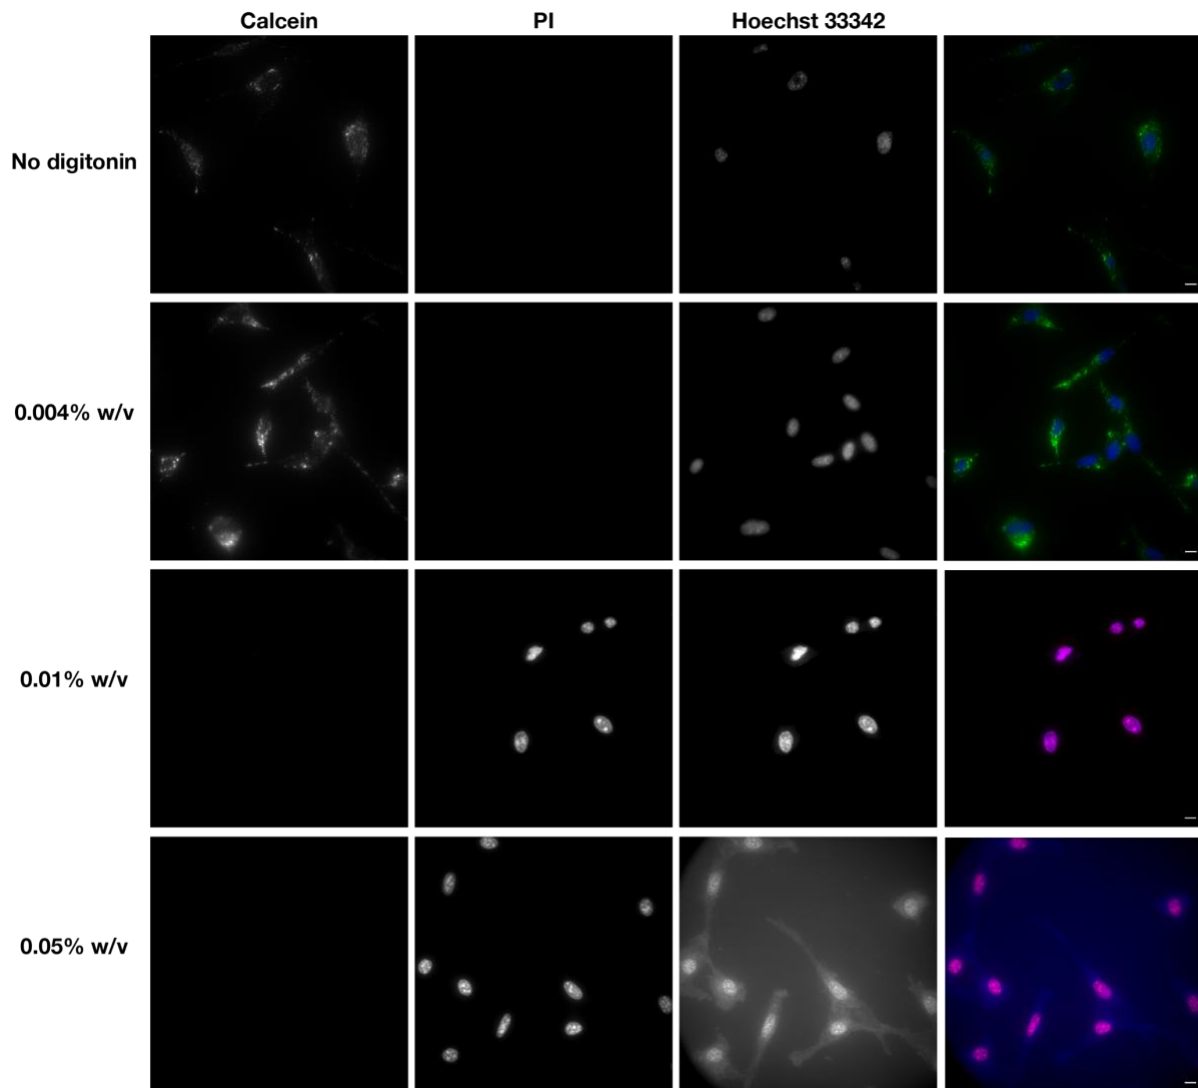

**Supplementary Fig. 3: Complete cell permeabilisation can be achieved with 0.01% w/v digitonin.** 3T3 cells were incubated with 100  $\mu\text{g}/\text{mL}$  calcein for 2 hours prior to treatment with increasing concentrations of digitonin. Cells were then stained with Hoescht 33342 and propidium iodide (PI). Hoechst 33342 stains all cell nuclei (blue) and PI only stains nuclei of permeabilised cells (red). Calcein (green) is used as an endosomal marker. Complete permeabilisation of membranes is achieved at 0.01% w/v digitonin, shown by the presence of PI fluorescence and loss of calcein fluorescence.  $n=2$  independent experiments. Scale bar = 10  $\mu\text{m}$

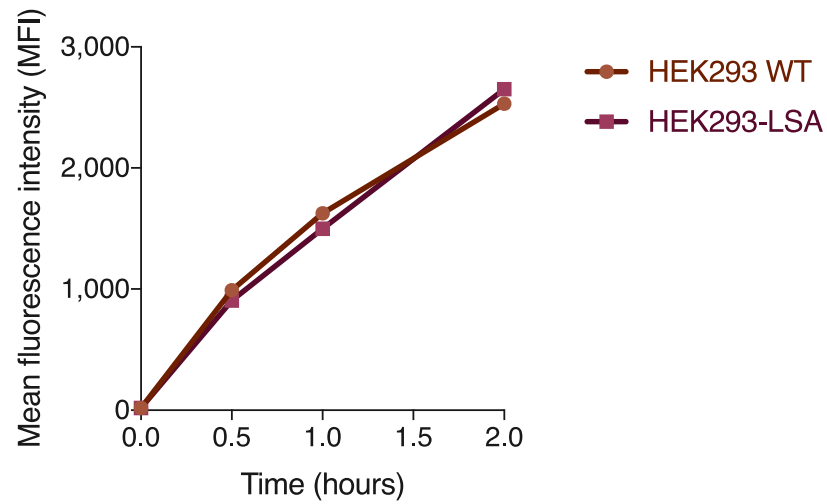

**Supplementary Fig. 4: Wild type (WT) HEK293 and HEK293-LSA cells show similar calcein uptake.** HEK293 (WT) and HEK293-LSA cells were seeded at 40,000 cells/well in a 96-well plate. After overnight incubation, the cells were treated with calcein for 0.5, 1 and 2 hours respectively. The cells were washed and then analysed by flow cytometry. n=1 experiment

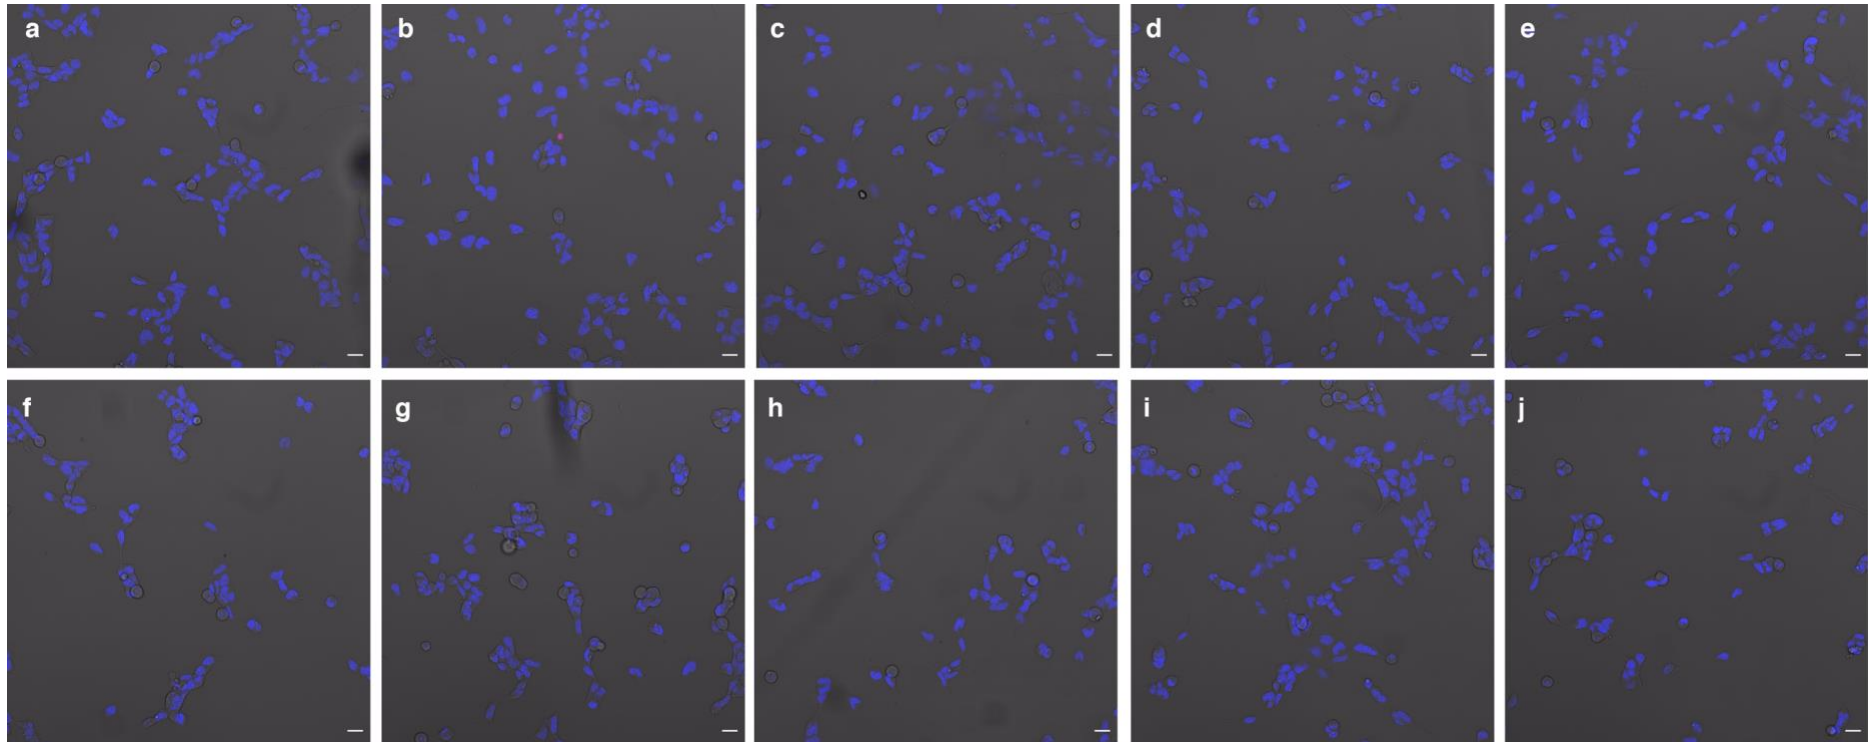

**Supplementary Fig. 5: HEK293-LSA cells maintain viability after treatment with EEP-GFP-HiBiT proteins.** After a 4-hour incubation with 1  $\mu$ M EEP-GFP-HiBiT proteins or free HiBiT peptide: a) GFP, b) R9, c) TAT, d) ZF5.3, e) E5TAT, f) 5.3, g) pHD118, h) pHlip, i) HA2 and j) HiBiT, HEK293-LSA cells were washed and stained with Hoechst 33342 and propidium iodide (PI). Cells were imaged with confocal microscope. Hoechst 33342 stains all cell nuclei (blue) and PI only stains nuclei of dead cells (red). Fluorescence images are overlaid on bright-field image. Cells displayed their typical morphology, and less than 1% of the cells were positive for PI. n=2 independent experiments. Scale bar = 10  $\mu$ m

**a**

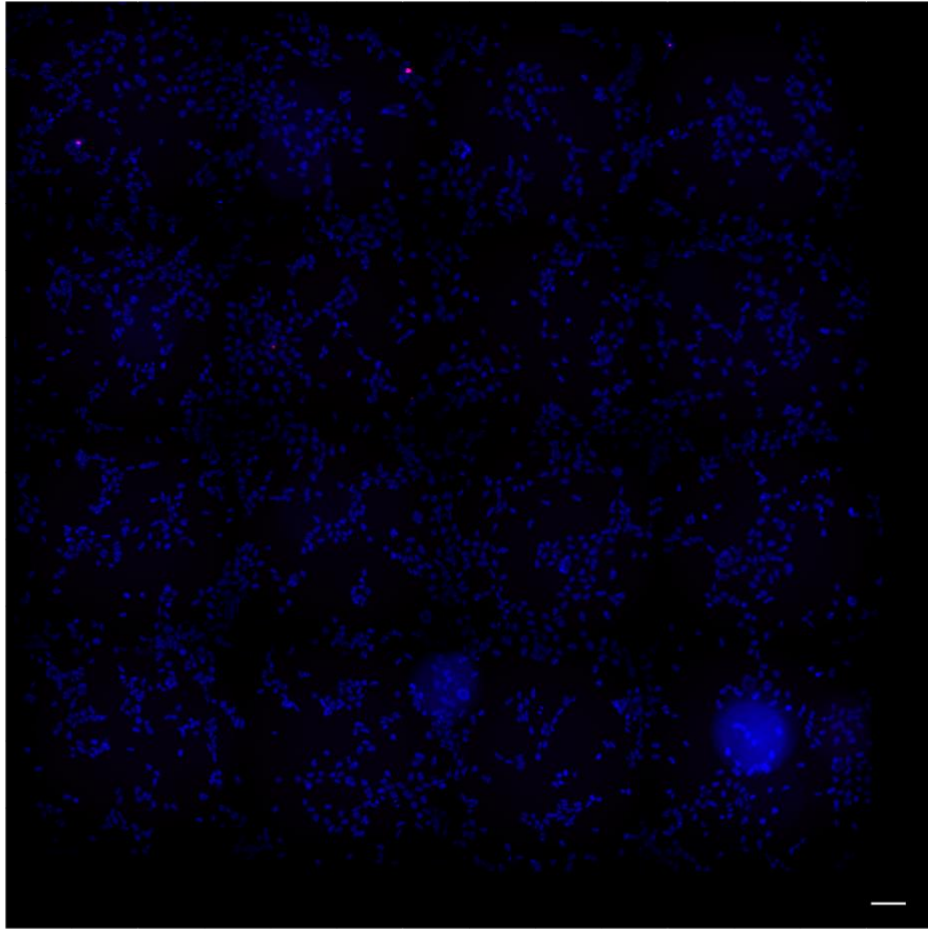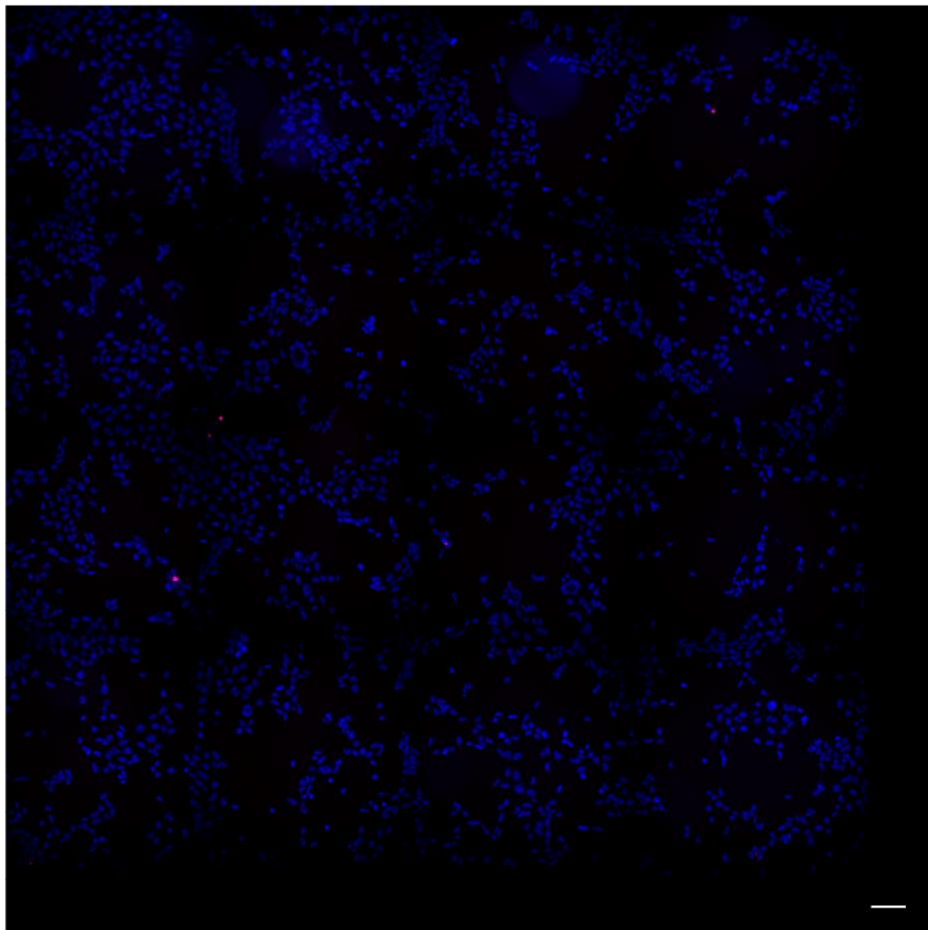



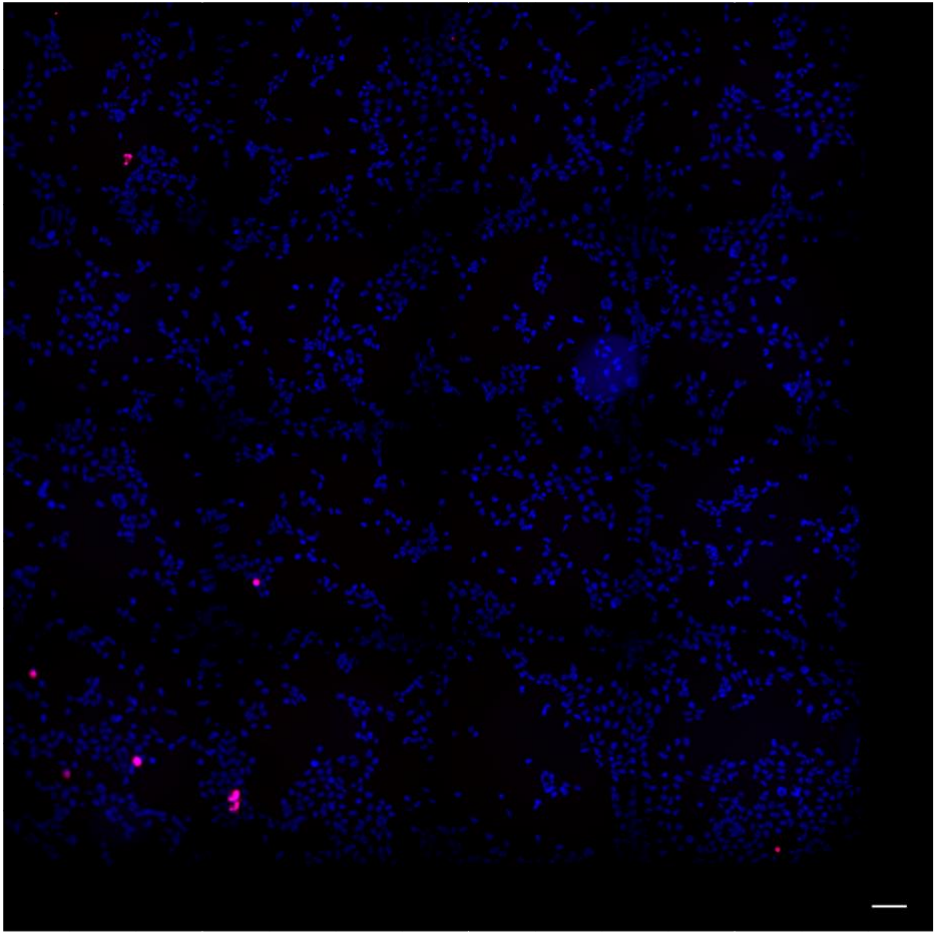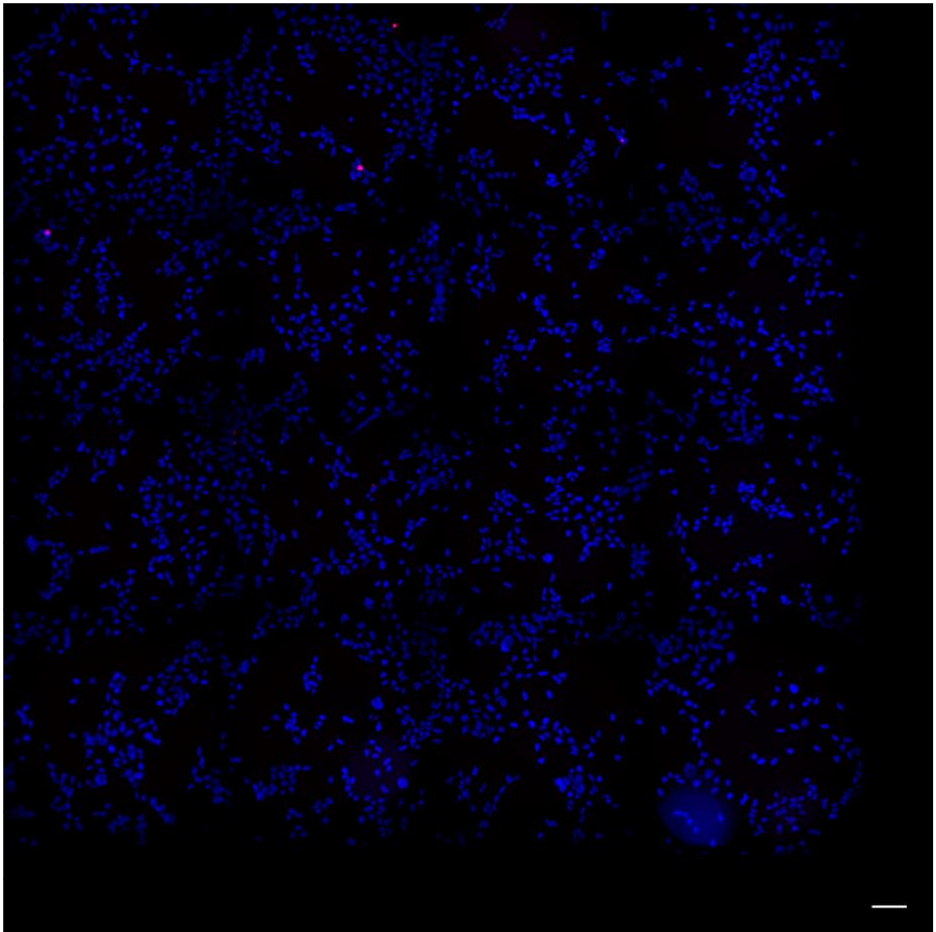



**b**

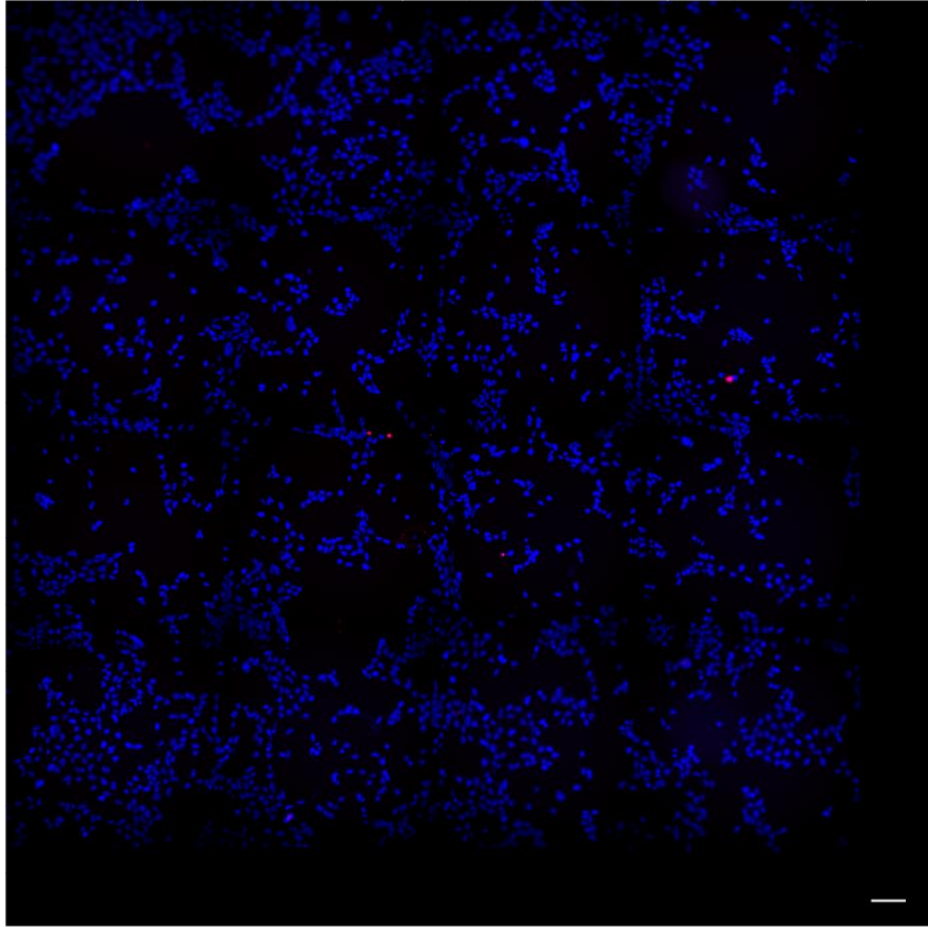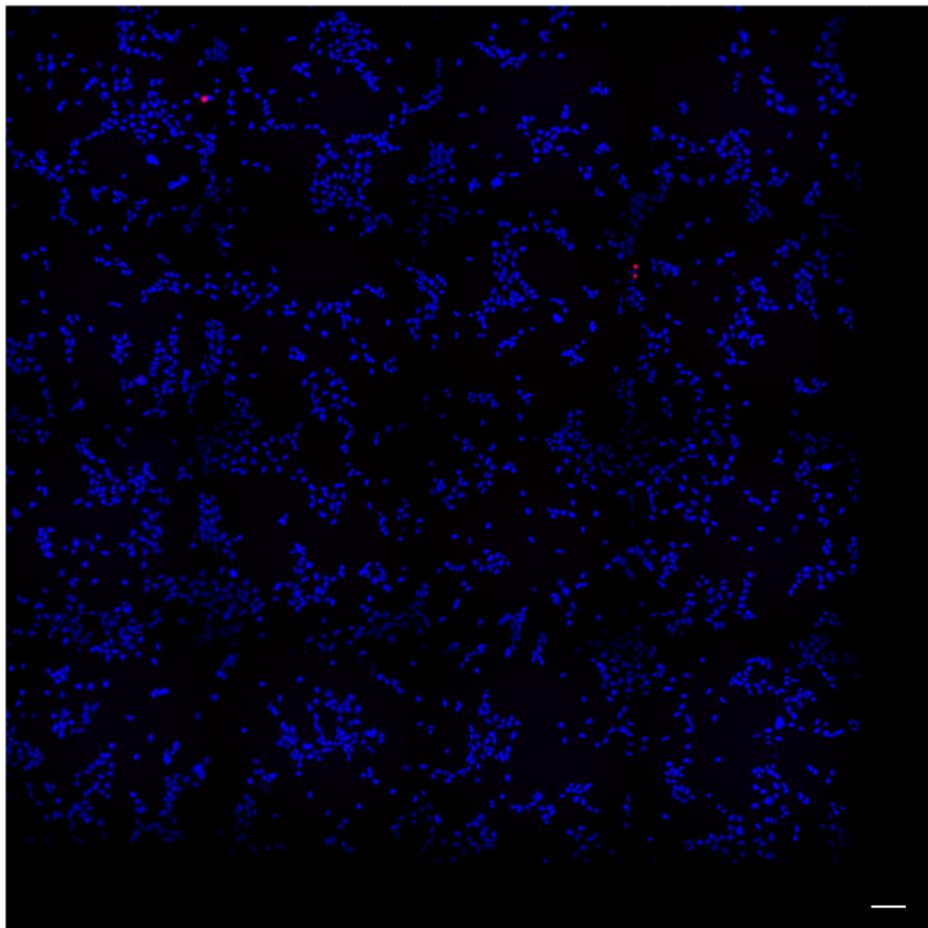

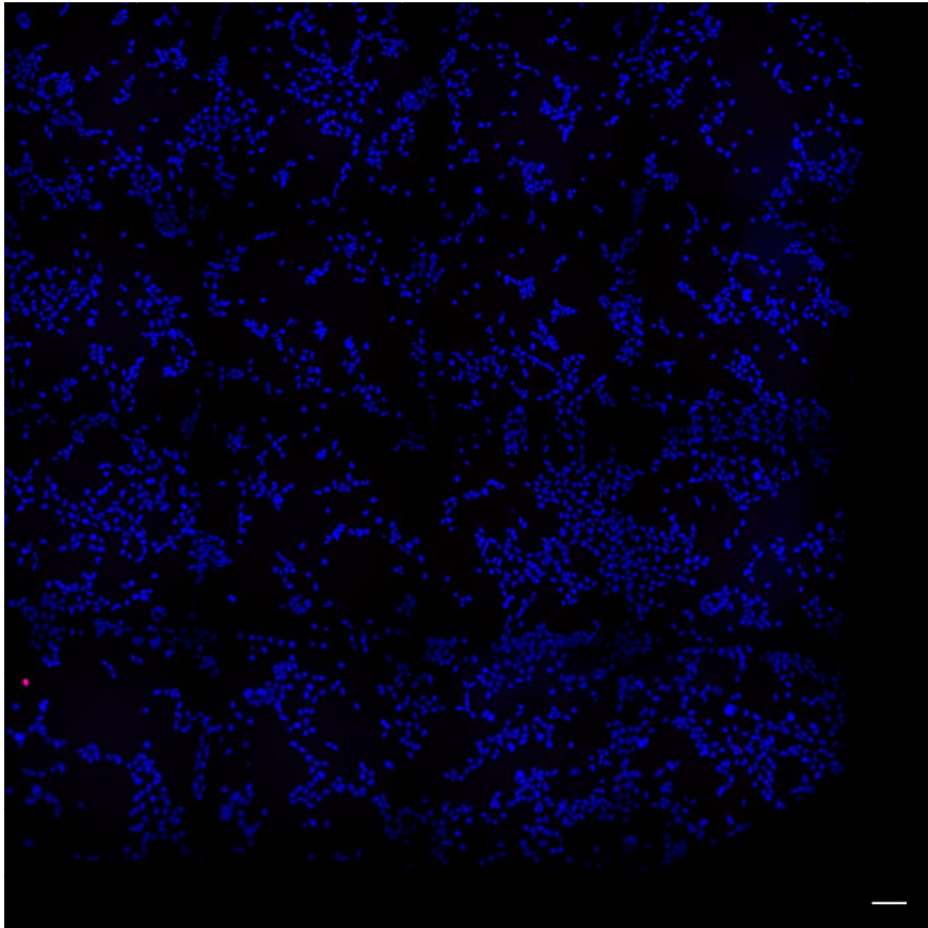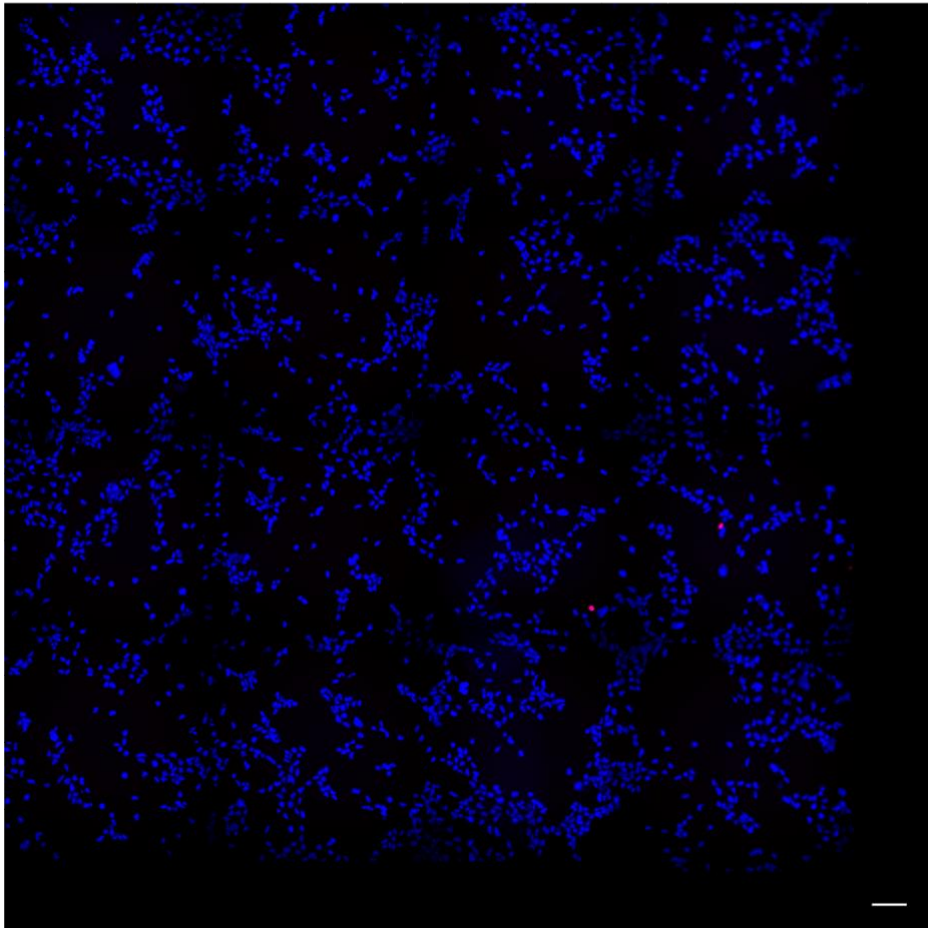

**Supplementary Fig. 6: HEK293-LSA cells maintain viability after treatment with GFP-HiBiT.** Montage images of a) untreated HEK293-LSA and b) cells treated with 1  $\mu$ M GFP-HiBiT. After 4-hour incubation, cells were washed and stained with Hoechst 33342 and propidium iodide (PI). Hoechst 33342 stains all cell nuclei (blue) and PI only stains nuclei of dead cells (red). Less than 1% of the cells were positive for PI. n=2 independent experiments. Scale bar = 100  $\mu$ m

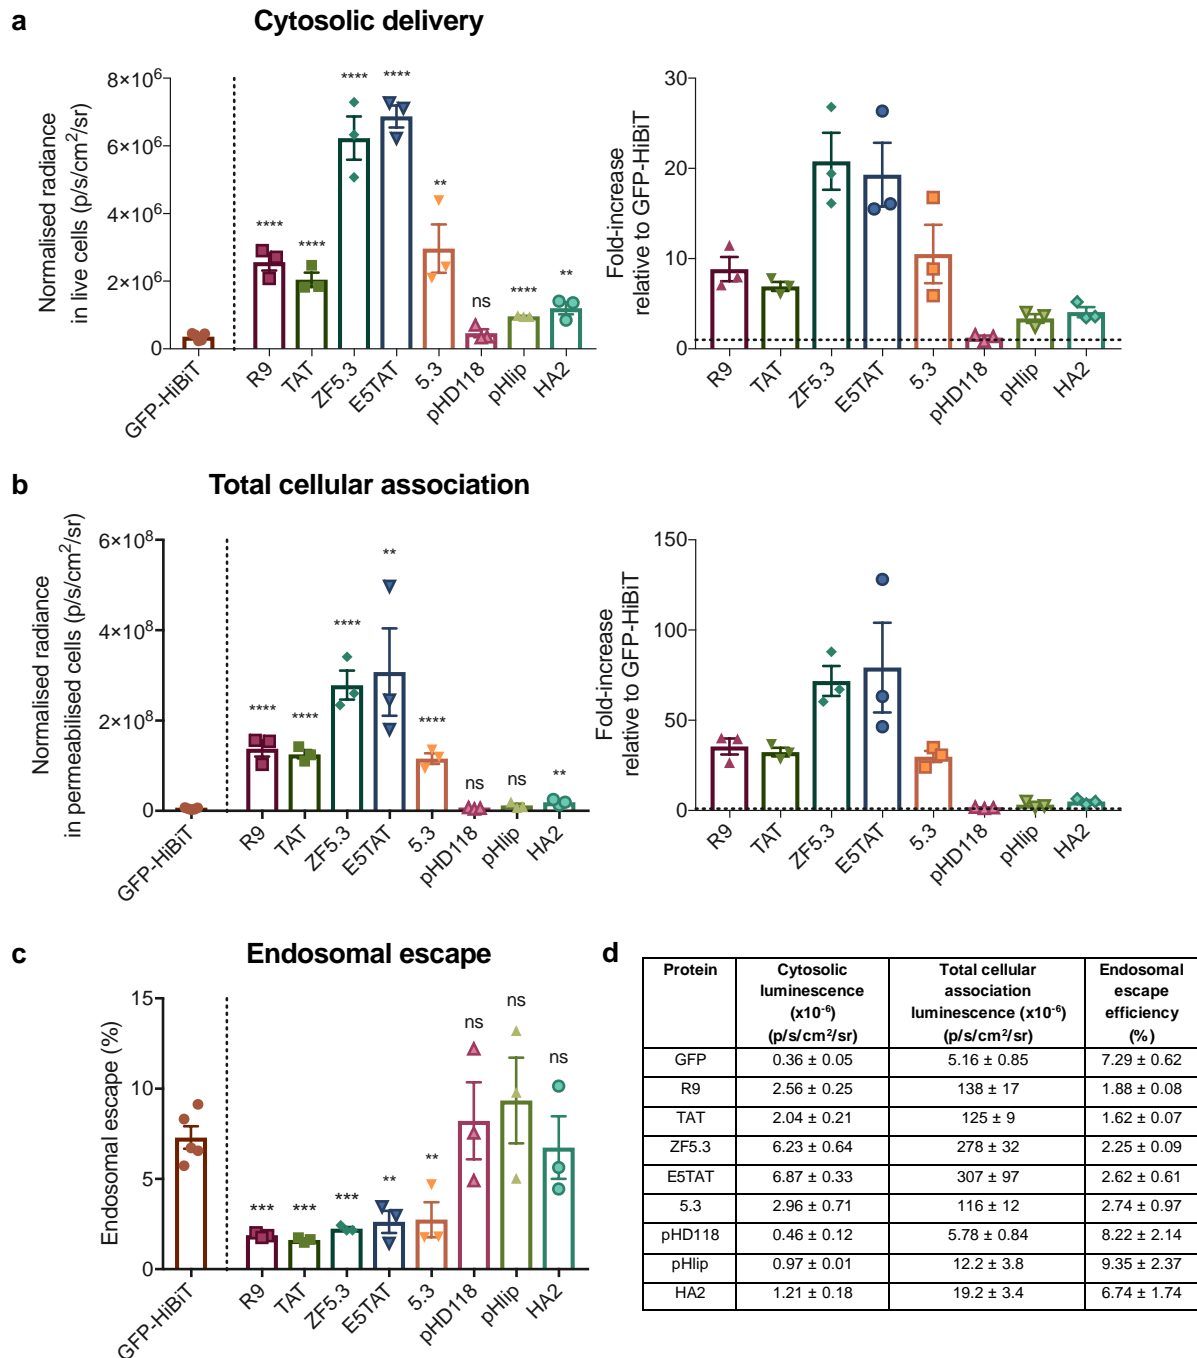

**Supplementary Fig. 7: Cationic EEPs increase cytosolic delivery of GFP but do not increase endosomal escape efficiency in HeLa cells.** a) Cytosolic luminescent signal of EEP-GFP-HiBiT in HeLa-LSA cells and fold-increase in signal with respect to GFP (represented by dotted line = 1). HeLa-LSA cells were incubated with EEP-GFP-HiBiT proteins at 1  $\mu$ M for 4 hours. Data represents mean  $\pm$  SEM, n=3 independent experiments. Kruskal-Wallis with uncorrected Dunn's test was used to analyse the data. b) Total cellular association of EEP-GFP-HiBiT in HeLa cells and fold-increase with respect to GFP (represented by dotted line = 1) determined by permeabilising the cells using 0.01% w/v digitonin. Data represents mean  $\pm$  SEM, n=3 independent experiments. Kruskal-Wallis with uncorrected Dunn's test was used to analyse the data. c) Endosomal escape efficiency of EEP-GFP-HiBiT proteins determined by ratioing cytosolic signal with total cellular association. Data represents mean  $\pm$  SEM, n=3 independent experiments. Kruskal-Wallis with uncorrected Dunn's test was used to analyse the data. d) Summary of cytosolic luminescence, total cellular association luminescence and endosomal escape efficiency for all proteins. Data represents mean  $\pm$  SEM. Data represents mean  $\pm$  SEM, n=3 independent experiments. Kruskal-Wallis with uncorrected Dunn's test was used to analyse the data, with GFP being the control group. ns denote  $p > 0.05$ , \* denotes  $p < 0.05$ , \*\* denotes  $p < 0.01$  and \*\*\* denotes  $p < 0.001$

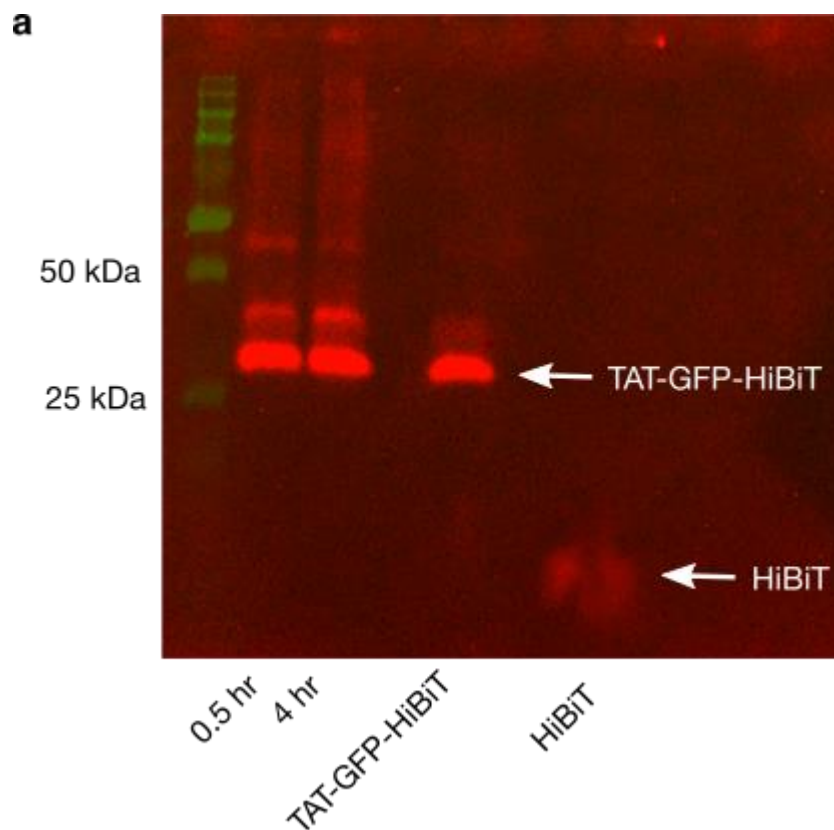

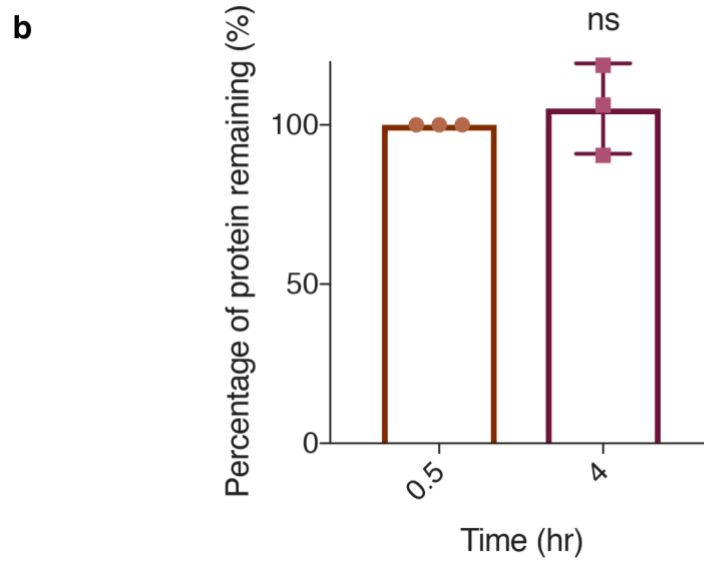

**Supplementary Fig. 8: TAT-GFP-HiBiT protein does not degrade after 4-hour incubation in HEK293 cells.** a) TAT-GFP-HiBiT protein (1  $\mu$ M) was allowed to bind to surface of HEK293 cells for 1 hour on ice. Unbound proteins were washed away and cells were incubated at 37°C for 0.5 or 4 hours to allow internalisation to take place. Cells were lysed with RIPA buffer (supplemented with protease inhibitor) and lysate was analysed by western blot. Untreated cell lysate was spiked with TAT-GFP-HiBiT or free HiBiT peptide. n = 3 independent experiments b) Percentage of intact TAT-GFP-HiBiT remaining in cell lysate was quantified using densitometric analysis of western blot. No significant decrease in the amount of intact TAT-GFP-HiBiT was observed after 4 hours. Two-tailed unpaired t test was used to analyse the data. Data represents mean  $\pm$  SEM, n = 3 independent experiments. ns (not significant) denotes  $p > 0.05$



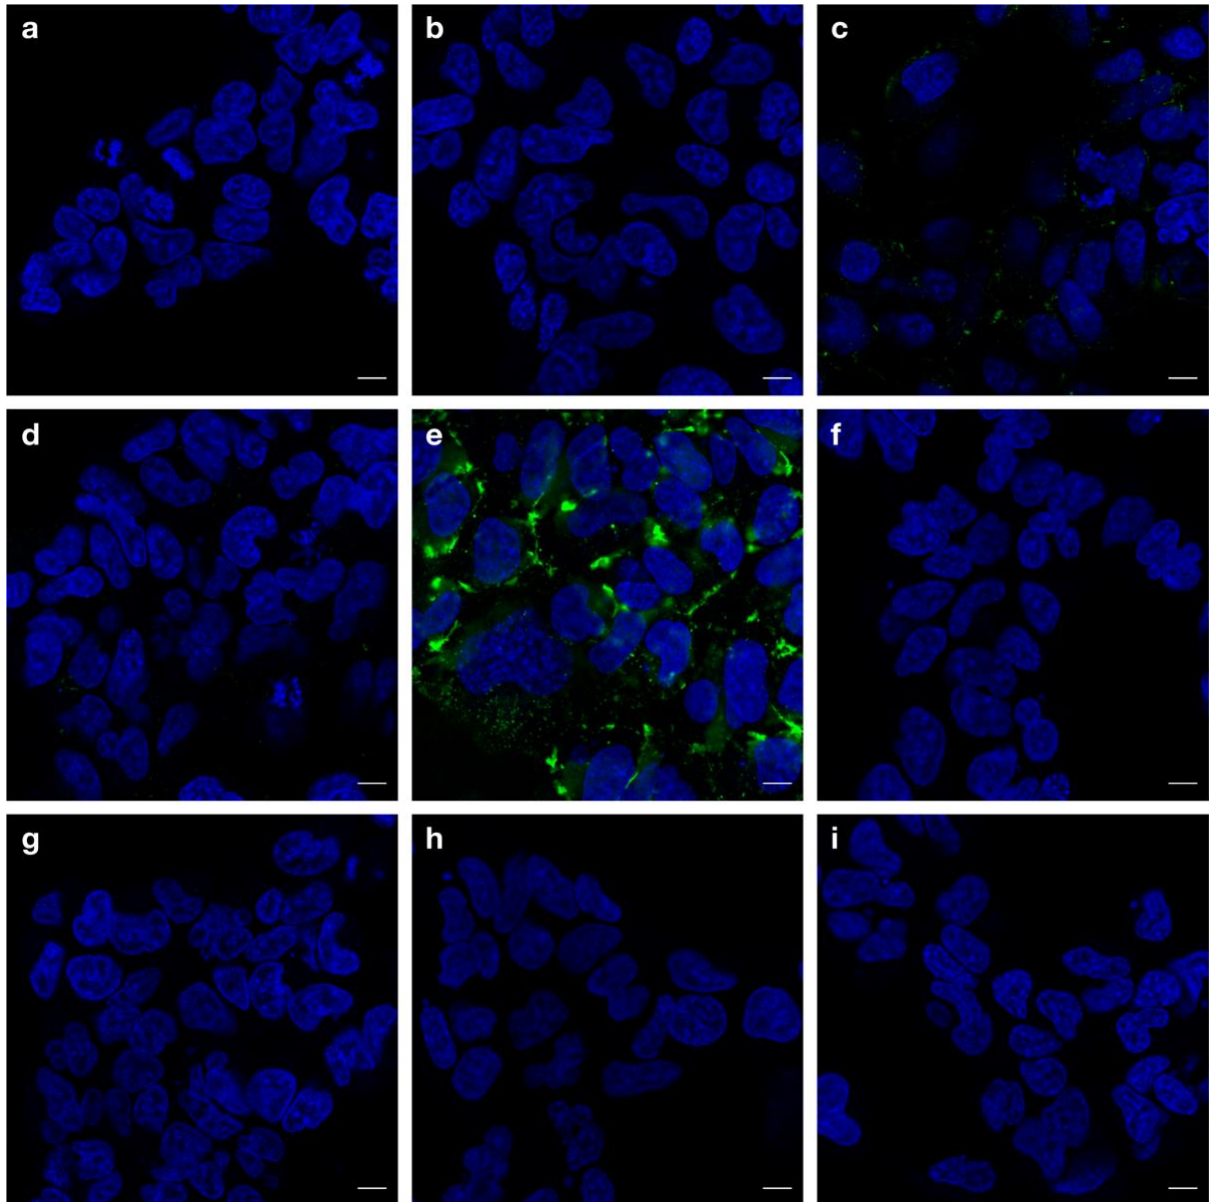

**Supplementary Fig. 9: EEP-GFP-HiBiT fusion proteins exhibit punctate staining, suggesting limited endosomal escape.** HEK293-LSA cells treated with EEP-GFP-HiBiT (green) proteins: a) GFP, b) R9, c) TAT, d) ZF5.3, e) E5TAT, f) 5.3, g) pHD118, h) pHlip and i) HA2 at 1  $\mu$ M for 4 hours. Cells were washed and nuclei was stained with Hoechst 33342 (blue) before confocal microscopy. Images displayed with the same dynamic range to enable comparison of intensity. n=2 independent experiments. Scale bar = 10  $\mu$ m

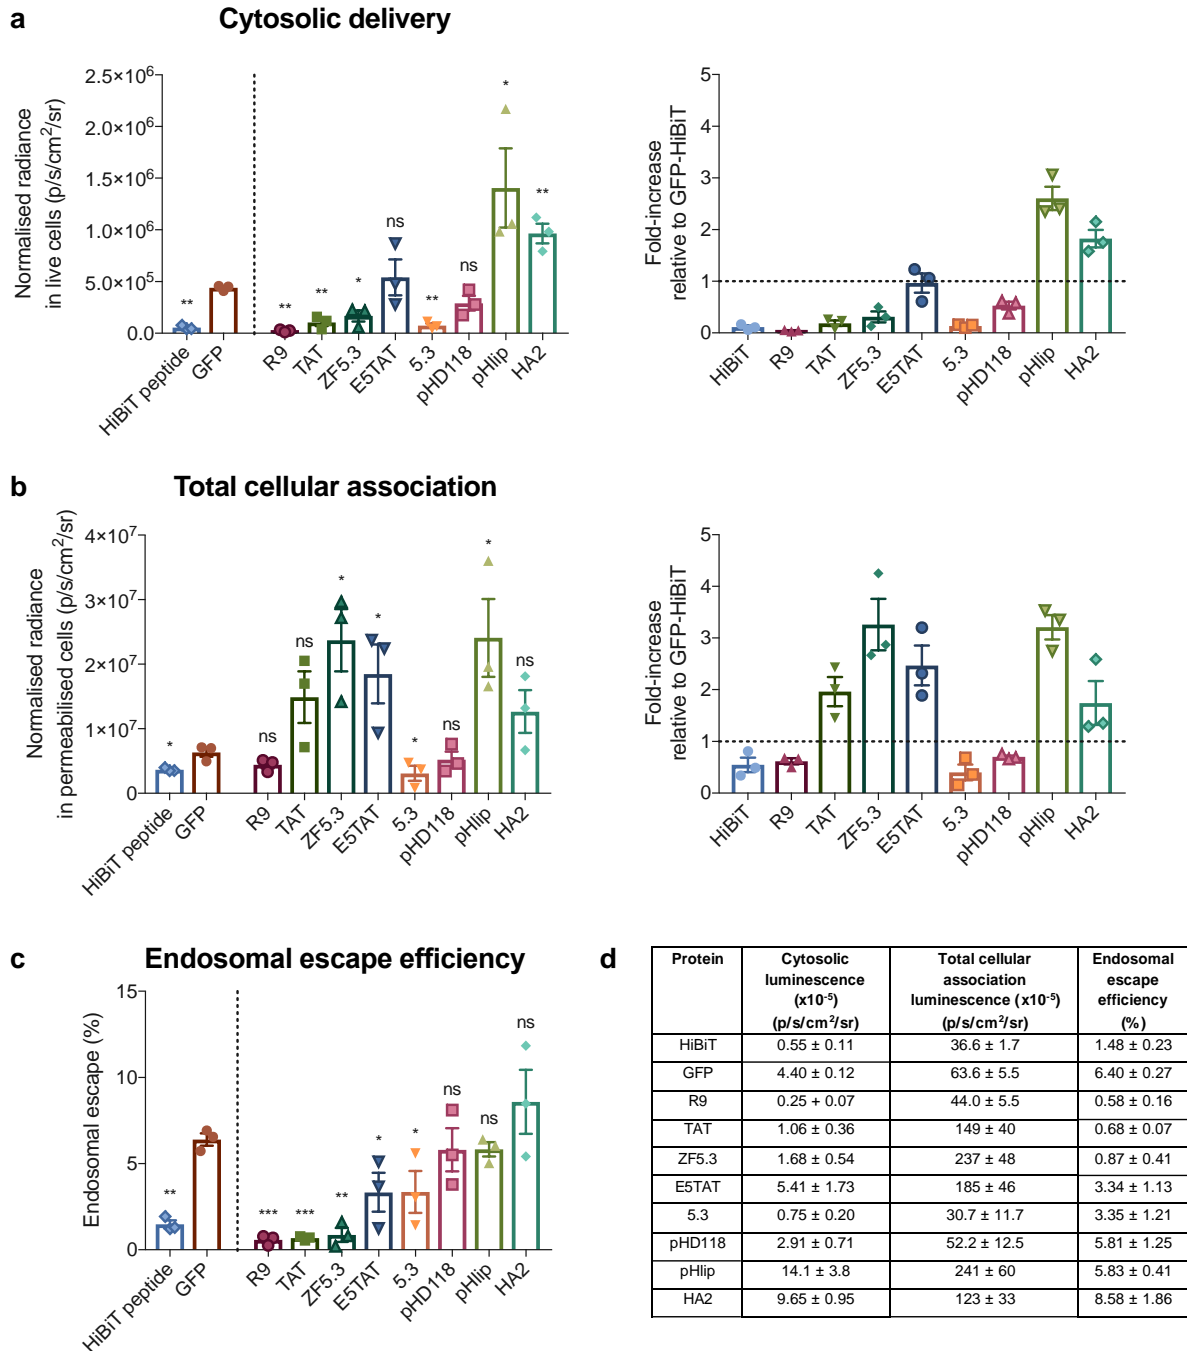

**Supplementary Fig. 10: EEPs do not increase endosomal escape efficiency of GFP in HeLa cells.** a) Cytosolic luminescent signal of EEP-GFP-HiBiT in HeLa-LSA cells and fold-increase in signal with respect to GFP (represented by dotted line = 1). HeLa-LSA cells were incubated with EEP-GFP-HiBiT proteins at varying concentrations for 4 hours. Data represents mean ± SEM, n=3 independent experiments. Kruskal-Wallis with uncorrected Dunn's test was used to analyse the data. b) Total cellular association of EEP-GFP-HiBiT in HeLa cells and fold-increase with respect to GFP (represented by dotted line = 1) determined by permeabilising the cells using 0.01% w/v digitonin. Data represents mean ± SEM, n=3 independent experiments. Kruskal-Wallis with uncorrected Dunn's test was used to analyse the data. c) Endosomal escape efficiency of EEP-GFP-HiBiT proteins determined by ratioing cytosolic signal with total cellular association. Data represents mean ± SEM, n=3 independent experiments. Kruskal-Wallis with uncorrected Dunn's test was used to analyse the data. d) Summary of cytosolic luminescence, total cellular association luminescence and



endosomal escape efficiency for all proteins. Data represents mean  $\pm$  SEM,  $n=3$  independent experiments. Kruskal-Wallis with uncorrected Dunn's test was used to analyse the data, with GFP being the control group. ns denote  $p > 0.05$ , \* denotes  $p < 0.05$ , \*\* denotes  $p < 0.01$  and \*\*\* denotes  $p < 0.001$

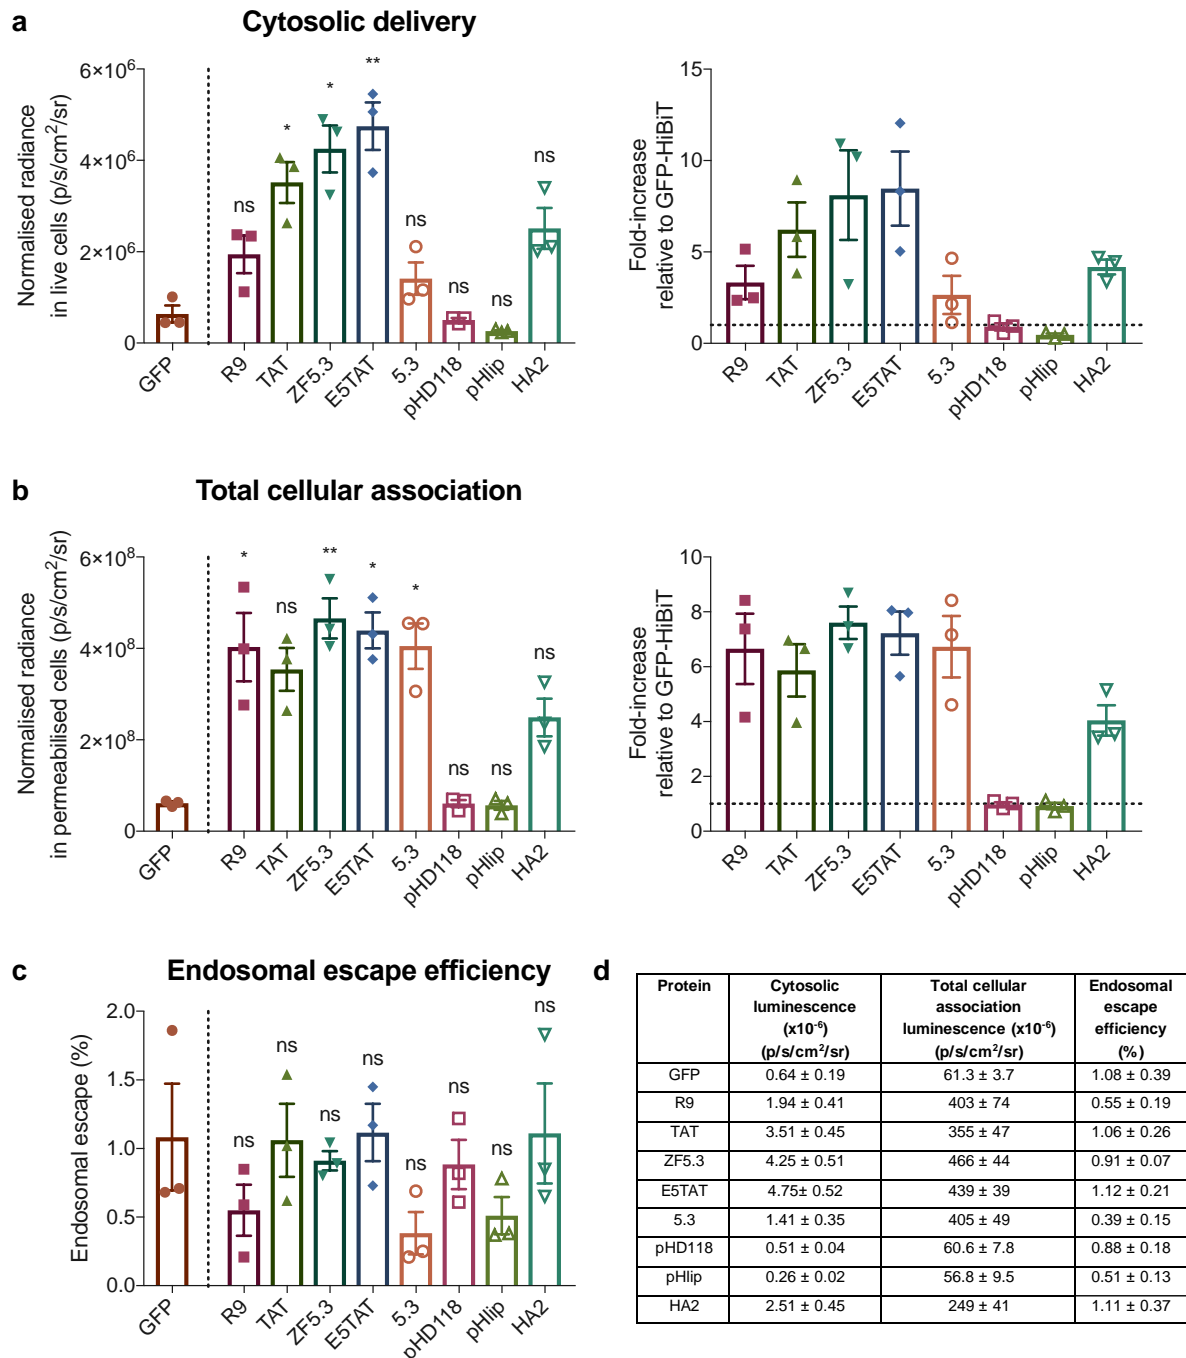

**Supplementary Fig. 11: EEPs do not increase endosomal escape efficiency of GFP in a concentration-dependent manner in HEK293 cells.** a) Cytosolic luminescent signal of EEP-GFP-HiBiT in HEK293-LSA cells and fold-increase in signal with respect to GFP (represented by dotted line = 1). HEK293-LSA cells were incubated with EEP-GFP-HiBiT proteins at 10  $\mu$ M for 4 hours. Data represents mean  $\pm$  SEM,  $n=3$  independent experiments. Kruskal-Wallis with uncorrected Dunn's test was used to analyse the data. b) Total cellular association of EEP-GFP-HiBiT in HEK293 cells and fold-increase with respect to GFP (represented by dotted line = 1) determined by permeabilising the cells using 0.01% w/v

digitonin. Data represents mean  $\pm$  SEM, n=3 independent experiments. Kruskal-Wallis with uncorrected Dunn's test was used to analyse the data. c) Endosomal escape efficiency of EEP-GFP-HiBiT proteins determined by ratioing cytosolic signal with total cellular association. Data represents mean  $\pm$  SEM, n=3 independent experiments. Kruskal-Wallis with uncorrected Dunn's test was used to analyse the data. d) Summary of cytosolic luminescence, total cellular association luminescence and endosomal escape efficiency for all proteins. Data represents mean  $\pm$  SEM, n=3 independent experiments. Kruskal-Wallis with uncorrected Dunn's test was used to analyse the data, with GFP being the control group. ns denotes  $p > 0.05$ , \* denotes  $p < 0.05$  and \*\* denotes  $p < 0.01$

**a** Cytosolic delivery

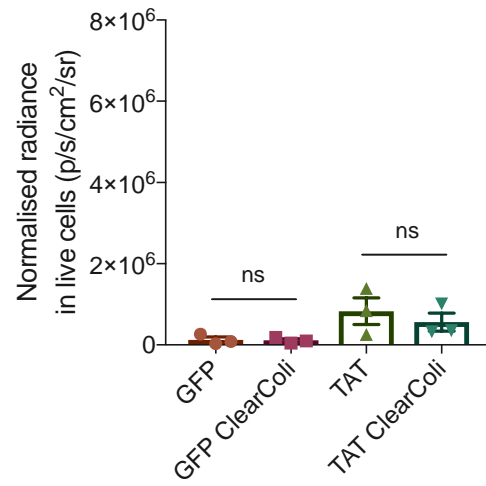

**b** Total cellular association

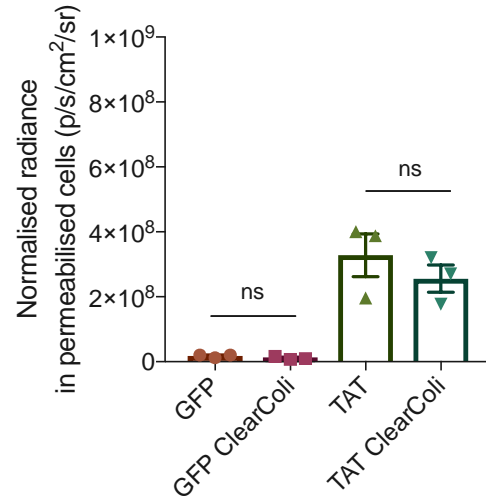

**c** Endosomal escape

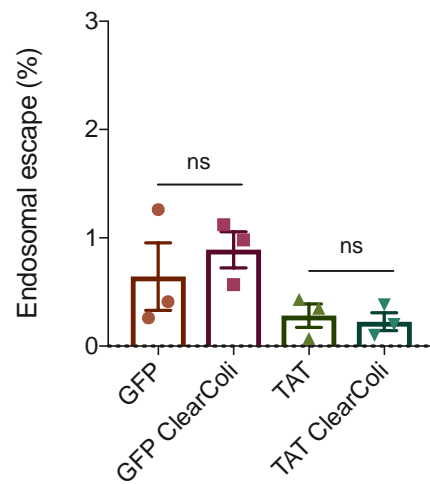

**Supplementary Fig. 12: Endosomal escape efficiency of GFP-HiBiT and TAT-GFP-HiBiT synthesised in E. Coli or ClearColi remains similar.** a) Cytosolic luminescent signal of GFP-HiBiT and TAT-GFP-HiBiT in HEK293-LSA cells. HEK293-LSA cells were incubated with proteins at 1  $\mu$ M for 4 hours. Two-tailed unpaired t test was used to analyse the data. GFP was compared to GFP ClearColi, TAT was compared to TAT ClearColi. Data represents mean  $\pm$  SEM, n=3 independent experiments. b) Total cellular association in HEK293-LSA cells determined by permeabilising the cells using 0.01% w/v digitonin. Two-tailed unpaired t test was used to analyse the data. GFP was compared to GFP ClearColi, TAT was compared to TAT ClearColi. Data represents mean  $\pm$  SEM, n=3 independent experiments. c) Endosomal escape efficiency proteins determined by ratioing cytosolic signal with total cellular association. Two-tailed unpaired t test was used to analyse the data. GFP was compared to GFP ClearColi, TAT was compared to TAT ClearColi. Data represents mean  $\pm$  SEM, n=3 independent experiments. ns (not significant) denotes  $p > 0.05$

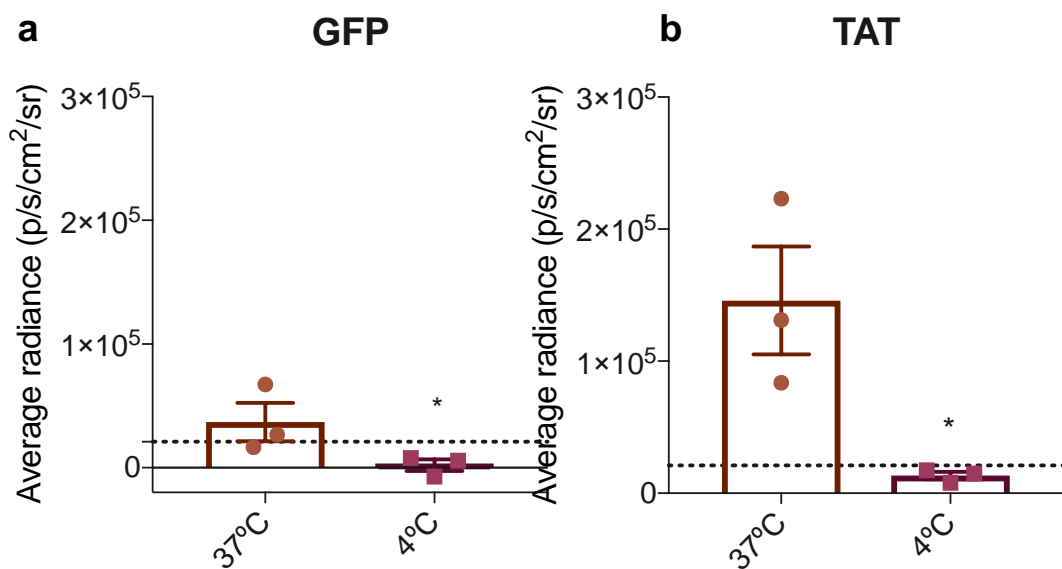

**Supplementary Fig. 13: Incubation at 4°C reduces cytosolic delivery of proteins.** HEK293-LSA cells were treated with 1  $\mu$ M of a) GFP-HiBiT or b) TAT-GFP-HiBiT at 37°C and 4°C for 4 hours to compare their level of cytosolic delivery. Dotted line indicates limit of detection. One-tailed unpaired t test was used to analyse this data. Data represents mean  $\pm$  SEM, n=3 independent experiments. ns denotes  $p > 0.05$  and \* denotes  $p < 0.05$

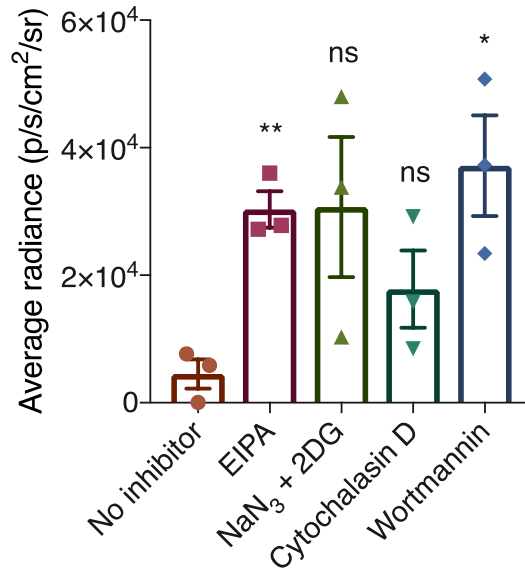

**Supplementary Fig. 14: Luminescent signal in cell supernatant after treatment with endocytosis inhibitors.** HEK293-LSA cells were treated with endocytosis inhibitors and 1  $\mu$ M of GFP-HiBiT. After 4-hour incubation, luminescence in cell supernatant was measured. Two-tailed unpaired t test was used to compare between no inhibitor and inhibitor treatment. Data represents mean  $\pm$  SEM, n=3 independent experiments. ns denotes  $p > 0.05$ , \* denotes  $p < 0.05$  and \*\* denotes  $p < 0.01$

GFP

MSKHHHHS~~SGHHHTGHHHHS~~SGSHHHTGHINLKVKGQDGNEVFFRIKRSTQLK~~LMNAYCD~~  
 RQSVDMT~~AIAFLDGRRLRAEQTPDELEMEDGDEIDAMLHQTGG~~SKGEELFTGVVPILVELDG  
 DVNGHKFSVRGEGEGDATNGKLT~~LKFICTTGKLPVPWPTLVTT~~LTYG~~VLCFSRYPDHMKRHDF~~  
 FKSAMPEGYVQERTISFKDDGTYKTRAEVKFEGDTLVNRIELKGIDFKEDGNILGHKLEYNFN~~SH~~  
 NVYITADKQKNGIKAYFKIRHNVEDGSVQLADHYQQNTPIGDGPVLLPDNH~~YLS~~TQSVLSKD  
 PNEKRDH~~MVLL~~EDVTAAGITHGMD~~E~~LYK VSGWRLFKKISGGSG

R9

MSKHHHHS~~SGHHHTGHHHHS~~SGSHHHTGHINLKVKGQDGNEVFFRIKRSTQLK~~LMNAYCD~~  
 RQSVDMT~~AIAFLDGRRLRAEQTPDELEMEDGDEIDAMLHQTGG~~GRRRRRRRRR~~SKGEELFT~~  
 GVPILVELDGDVNGHKFSVRGEGEGDATNGKLT~~LKFICTTGKLPVPWPTLVTT~~LTYG~~VLCFSR~~  
 YPDHMKRHDFFKSAMPEGYVQERTISFKDDGTYKTRAEVKFEGDTLVNRIELKGIDFKEDGNIL  
 GHKLEYNFN~~SH~~NVYITADKQKNGIKAYFKIRHNVEDGSVQLADHYQQNTPIGDGPVLLPDN  
 HYLSTQSVLSKDPNEKRDH~~MVLL~~EDVTAAGITHGMD~~E~~LYK VSGWRLFKKISGGSG

TAT

MSKHHHHS~~SGHHHTGHHHHS~~SGSHHHTGHINLKVKGQDGNEVFFRIKRSTQLK~~LMNAYCD~~  
 RQSVDMT~~AIAFLDGRRLRAEQTPDELEMEDGDEIDAMLHQTGG~~GRKKRRORRRPPQASSK  
 GEELFTGVVPILVELDGDVNGHKFSVRGEGEGDATNGKLT~~LKFICTTGKLPVPWPTLVTT~~LTYG  
 VLCFSRYPDHMKRHDFFKSAMPEGYVQERTISFKDDGTYKTRAEVKFEGDTLVNRIELKGIDFK  
 EDGNILGHKLEYNFN~~SH~~NVYITADKQKNGIKAYFKIRHNVEDGSVQLADHYQQNTPIGDGPV  
 LLPDNH~~YLS~~TQSVLSKDPNEKRDH~~MVLL~~EDVTAAGITHGMD~~E~~LYK VSGWRLFKKISGGSG

ZF5.3

MSKHHHHS~~GH~~HHHTGHHHHS~~GS~~HHHTGHINLKVK~~Q~~DGNEVFFRIKRSTQLK~~K~~LMNAYCD  
RQSVDMTAIAFLFDGRRRLRAEQTPDELEMEDGDEIDAMLHQTGGWYSCNVCGKAFVLSRHL  
NRHLRVHRRATASSKGEELFTGVVPILVELDGDVNGHKFSVRGEGEGDATNGKLT~~L~~KFICTTGK  
LPVPWPTLVTTLYGVLCFSRYPDHMKRHDFFKSAMPEGYVQERTISFKDDGTYKTRAEVKFE  
GDTLVNRIELKGIDFKEDGNILGHKLEYNFN~~SH~~NVYITADKQKNGIKAYFKIRHNVEDG~~S~~VQLA  
DHYQQNTPIGDGPVLLPDNHYLSTQSVLSKDPNEKRDH~~M~~VLLEDVTAAGITHGMDELYKVS  
GWRLFKKISGGSG

E5TAT

MSKHHHHS~~GH~~HHHTGHHHHS~~GS~~HHHTGHINLKVK~~Q~~DGNEVFFRIKRSTQLK~~K~~LMNAYCD  
RQSVDMTAIAFLFDGRRRLRAEQTPDELEMEDGDEIDAMLHQTGGGLFEAIAEFIENGWEGLIE  
GMGRKKRRORRRPPOASSKGEELFTGVVPILVELDGDVNGHKFSVRGEGEGDATNGKLT~~L~~KFI  
CTTGKLPVPWPTLVTTLYGVLCFSRYPDHMKRHDFFKSAMPEGYVQERTISFKDDGTYKTR  
EVKFEGDTLVNRIELKGIDFKEDGNILGHKLEYNFN~~SH~~NVYITADKQKNGIKAYFKIRHNVEDG  
SVQLADHYQQNTPIGDGPVLLPDNHYLSTQSVLSKDPNEKRDH~~M~~VLLEDVTAAGITHGMD  
LYKVSGWRLFKKISGGSG

5.3

MSKHHHHS~~GH~~HHHTGHHHHS~~GS~~HHHTGHINLKVK~~Q~~DGNEVFFRIKRSTQLK~~K~~LMNAYCD  
RQSVDMTAIAFLFDGRRRLRAEQTPDELEMEDGDEIDAMLHQTGGGPSOPTYPGDDAPVRDLI  
RFYRDLRRYLNVVTRHRYASSKGEELFTGVVPILVELDGDVNGHKFSVRGEGEGDATNGKLT~~L~~K  
FICTTGKLPVPWPTLVTTLYGVLCFSRYPDHMKRHDFFKSAMPEGYVQERTISFKDDGTYKTR  
AEVKFEGDTLVNRIELKGIDFKEDGNILGHKLEYNFN~~SH~~NVYITADKQKNGIKAYFKIRHNVED  
GSVQLADHYQQNTPIGDGPVLLPDNHYLSTQSVLSKDPNEKRDH~~M~~VLLEDVTAAGITHGMD  
ELYKVSGWRLFKKISGGSG

pHD118

MSKHHHHS~~GH~~HHHTGHHHHS~~GS~~HHHTGHINLKVK~~Q~~DGNEVFFRIKRSTQLK~~K~~LMNAYCD  
RQSVDMTAIAFLFDGRRRLRAEQTPDELEMEDGDEIDAMLHQTGGGIGEV~~L~~HELADDLPELOSWI  
KAAQQLSKGEELFTGVVPILVELDGDVNGHKFSVRGEGEGDATNGKLT~~L~~KFICTTGKLPVPWPT  
LVTTLYGVLCFSRYPDHMKRHDFFKSAMPEGYVQERTISFKDDGTYKTRAEVKFEGDTLVNRI  
ELKGIDFKEDGNILGHKLEYNFN~~SH~~NVYITADKQKNGIKAYFKIRHNVEDG~~S~~VQLADHYQQNT  
PIGDGPVLLPDNHYLSTQSVLSKDPNEKRDH~~M~~VLLEDVTAAGITHGMDELYKVSGWRLFKKIS  
GGSG

pHlip

MSKHHHHS~~GH~~HHHTGHHHHS~~GS~~HHHTGHINLKVK~~Q~~DGNEVFFRIKRSTQLK~~K~~LMNAYCD  
RQSVDMTAIAFLFDGRRRLRAEQTPDELEMEDGDEIDAMLHQTGGGRKKRRORRRPPOASSK

GEELFTGVVPIVELDGDVNGHKFSVRGEGEGDATNGKLT LKFICTTGKLPVPWPTLVTTLYG  
VLCFSRYPDHMKRHDFFKSAMPEGYVQERTISFKDDGTYKTRAEVKFEGDTLVNRIELKGIDFK  
EDGNILGHKLEYNFN SHNVYITADKQKNGIKAYFKIRHNVEDG SVQLADHYQQNTPIGDGPV  
LLPDNHYLSTQSVLSKDPNEKRDH MVLLEDVTAAGITHGMDELYK VSGWRLFKKISGGSG

HA2

MSKHHHHS GHHHTGHHHHS GSHHHTGHINLKVKGQDGNEVFFRIKRSTQLK KLMNAYCD  
RQSVDMTAIAFLFDGRRLRAEQTPDELEMEDGDEIDAMLHQTGG GLFEAIEGFIENGWEGMI  
DGWYGASSKGEELFTGVVPIVELDGDVNGHKFSVRGEGEGDATNGKLT LKFICTTGKLPVPW  
PTLVTTLYGVLCFSRYPDHMKRHDFFKSAMPEGYVQERTISFKDDGTYKTRAEVKFEGDTLVN  
RIELKGIDFKEDGNILGHKLEYNFN SHNVYITADKQKNGIKAYFKIRHNVEDG SVQLADHYQQ  
NTPIGDGPVLLPDNHYLSTQSVLSKDPNEKRDH MVLLEDVTAAGITHGMDELYK VSGWRLFK  
KISGGSG

**Supplementary Fig. 15: Full sequences of uncleaved protein samples used in this study.**

Sequences are coded as following: grey = 14xHis purification tag and bdSUMO; blue and underlined = endosomal escape peptide sequence; green = muGFP; yellow = HiBiT; none = amino acids intended to protect HiBiT peptide from C-terminal degradation. Note: bdSENPI cleaves after bdSUMO C-terminal GG.



| Name                                                | Sequence (5' – 3')                                         | Purpose                                                                                                                     |
|-----------------------------------------------------|------------------------------------------------------------|-----------------------------------------------------------------------------------------------------------------------------|
| <b>Constructs: pET – bdSUMO – EEP – GFP - HiBit</b> |                                                            |                                                                                                                             |
| P1                                                  | GGTACCACGCGTGCGCGCTGATCCGG                                 | Forward primer to generate vector PCR fragment to gibson assemble with 14xHis – bdSUMO – E5TAT – GFP – HiBit gene fragment. |
| P2                                                  | ATGTATATCTCCTTCTTAAAGTTAAACAAAAT                           | Reverse primer to generate vector PCR fragment to gibson assemble with 14xHis – bdSUMO – E5TAT – GFP – HiBit gene fragment. |
| P3                                                  | CATCTTTGAAAGATATAGTGCGTTCCT                                | Reverse primer to generate all EEP PCR fragments.                                                                           |
| P4                                                  | GAGATTGACGCCATGTTACACCAGACCGGTGGGAGCAAAGGAGAAGAACTTTTCACTG | Forward primer to generate GFP only PCR fragment.                                                                           |
| P5                                                  | GAGATTGACGCCATGTTACACCAGACCGGTGGGGGTCGTAAAAAACGTCGTCAG     | Forward primer to generate TAT PCR fragment.                                                                                |
| P6                                                  | GAGATTGACGCCATGTTACACCAGACCGGTGGGGGTCGTAGAAGACGGCGGCG      | Forward primer to generate R9 PCR fragment.                                                                                 |
| P7                                                  | GAGATTGACGCCATGTTACACCAGACCGGTGGGTGGTACTCTTGCAACGTTTGCG    | Forward primer to generate ZF5.3 PCR fragment.                                                                              |
| P8                                                  | GAGATTGACGCCATGTTACACCAGACCGGTGGGGGTCCGTCTCAGCCGACC        | Forward primer to generate 5.3 PCR fragment.                                                                                |
| P9                                                  | GAGATTGACGCCATGTTACACCAGACCGGTGGGATCGGCGAAGTGCTGC          | Forward primer to generate pHD118 PCR fragment.                                                                             |
| P10                                                 | GAGATTGACGCCATGTTACACCAGACCGGTGGGGCTGAGGAGCAACAACCATGG     | Forward primer to generate pHlip PCR fragment.                                                                              |
| P11                                                 | GAGATTGACGCCATGTTACACCAGACCGGTGGGGGTCTGTTTCAAGCGATCG       | Forward primer to generate HA2 PCR fragment.                                                                                |

| <b>Construct: pCDH - Large BiT</b>                    |                                                       |                                                                                         |
|-------------------------------------------------------|-------------------------------------------------------|-----------------------------------------------------------------------------------------|
| P12                                                   | TAGAGCTAGCGAATTCGATGGTCTTCACACTCGAAG                  | Forward primer to amplify Large BiT with pCDH vector overhangs.                         |
| P13                                                   | GTACTGAGGATCCCTAACTGTTGATGGTACTCGGAAC                 | Reverse primer to amplify Large BiT with pCDH vector overhangs.                         |
| <b>Construct: pCDH - Large BiT - SNAPtag- B-Actin</b> |                                                       |                                                                                         |
| P14                                                   | GACCGGCGCCTACTCTAGAGGCCACCATGATGGTCTTCACACTCGAAGA     | Forward primer to amplify Large BiT with pCDH overhang.                                 |
| P15                                                   | ATTCGCAGTCTTTGTCCATACTGTTGATGGTACTCGGA                | Reverse primer to amplify Large BiT with SNAP-tag overhang.                             |
| P16                                                   | TCCGAGTAACCATCAACAGTATGGACAAAGACTGCGAAAT              | Forward primer to amplify SNAP-tag with Large BiT overhang.                             |
| P17                                                   | CGGCGATATCATCATCCATGGATCCGCCTGCAGGACCCAG              | Reverse primer to amplify SNAP-tag with $\square$ -Actin overhang.                      |
| P18                                                   | ATGGATGATGATATCGCCGCGCTC                              | Forward primer to amplify $\square$ -Actin.                                             |
| P19                                                   | GATCCGATTTAAATTCGAATTCCTAGAAGCATTGCGGTGGACG           | Reverse primer to amplify $\square$ -Actin with pCDH overhang.                          |
| <b>Construct: pET - LargeBit</b>                      |                                                       |                                                                                         |
| P20                                                   | GAAAACCTGTACTTCCAATCCGGTT                             | Forward primer to generate pET vector PCR fragment for assembly with LargeBit fragment. |
| P21                                                   | CATATGTATATCTCCTTCTTAAAGTTAAACAA                      | Reverse primer to generate pET vector PCR fragment for assembly with LargeBit fragment. |
| P22                                                   | TTGTTTAACTTTAAGAAGGAGATACATATGGTCTTCACACTCGAAGATTTTCG | Forward primer to generate LargeBit PCR fragment with vector overhangs.                 |
| P23                                                   | AACCGGATTGGAAGTACAGGTTTTCACTAGTACTGTTGATGGTACTCGGAAC  | Reverse primer to generate LargeBit PCR fragment with vector overhangs.                 |

**Supplementary Table 1:** Complete list of primers used.

| <b>BSA</b>                 | <b>Expected average mass (kDa)</b> | <b>Observed mass (M/Z)</b> |
|----------------------------|------------------------------------|----------------------------|
| <b>[M+H]<sup>+</sup></b>   | ~ 66.5                             | 66777.4                    |
| <b>[M+2H]<sup>+2</sup></b> | ~ 33.3                             | 33255.6                    |

**Supplementary Table 2:** Calibration of the MALDI instrument was performed with BSA. Observed masses are peak centroid values, expected masses were observed within the peak which is relatively broad due to isotopic combinations.

|                                                                         | <b>GFP</b>     | <b>R9</b>      | <b>TAT</b>             | <b>ZF5.3</b>            | <b>E5TAT</b>   | <b>5.3</b>             | <b>pHD118</b>  | <b>pHlip</b>             | <b>HA2</b>     |
|-------------------------------------------------------------------------|----------------|----------------|------------------------|-------------------------|----------------|------------------------|----------------|--------------------------|----------------|
| <b>Expected average mass [M+H]<sup>+</sup> (Da)</b>                     | 28212.9        | 29675.6        | 30072                  | 31733.9                 | 32379.6        | 32716.9                | 31012          | 31200.2                  | 30943.8        |
| <b>Observed mass (M/Z)</b>                                              | <b>28075.8</b> | <b>29524.9</b> | <b>29936.2</b>         | <b>31587.0</b>          | <b>32227.7</b> | <b>32578.4</b>         | <b>31370.6</b> | <b>31058.5</b>           | <b>30811.9</b> |
| <b>Minor Fragments (corresponding amino acids lost from C-terminus)</b> |                |                | 29478.0<br>(-ISGGSG)   | 31135.6<br>(-ISGGSG)    |                | 31865.9<br>(-KKISGGSG) |                | 30595.0<br>(-ISGGSG)     |                |
|                                                                         |                |                | 29222.2<br>(-KKISGGSG) | 30869.5<br>(-KKISGGSG)  |                |                        |                | 30467.7<br>(-KISGGSG)    |                |
|                                                                         |                |                |                        | 30732.1<br>(-FKKISGGSG) |                |                        |                | 30347.1<br>(-KKISGGSG)   |                |
|                                                                         |                |                |                        |                         |                |                        |                | 30195.0<br>(FKKISGGSG)   |                |
|                                                                         |                |                |                        |                         |                |                        |                | 30084.4<br>(-LFKKISGGSG) |                |

**Supplementary Table 3: MALDI mass spectroscopy peak analysis of EEP-GFP-HiBiT proteins.** Observed masses are peak centroid values. Expected masses were observed within the peak which is relatively broad due to isotopic combinations. This is consistent with the difference in mass observed for BSA (Supplementary Table 1). The unusually broad appearance of pHD118 results in a centroid peak value that is greater than all other proteins, however the expected average mass is found within this broad peak. The minor fragments observed for some proteins correlate with a sequential loss of amino acids from the C-terminus, which is expected to be laser induced. Any true truncation which could affect the activity of HiBiT is compensated for by measuring the relative activity of each protein (Fig. 3).

| <b>Peptide sequence</b> | <b>Mass of fragment [M+H]<sup>+</sup></b> |
|-------------------------|-------------------------------------------|
| LFKKISGGSG              | 976.2                                     |
| FKKISGGSG               | 863.0                                     |
| KKISGGSG                | 715.8                                     |
| KISGGSG                 | 587.6                                     |
| ISGGSG                  | 459.5                                     |

**Supplementary Table 4:** Sequential peptide fragments from the C-terminus of EEP-GFP-HiBiT proteins which correlate with fragments observed in Supplementary Table 3.
